# Supplementary material
Source: ML conference proceedings conference paper supplement (https://openreview.net/forum?id=g9diuvxN6D)
Supplement: supplementary_material [file attachment]

version https://git-lfs.github.com/spec/v1
oid sha256:94c33b5ad58f9f073466548b7a9fc90be13d12dcbd21ed94ce276bc1a987f448
size 20142
