# Supplementary material
Source: ML conference proceedings conference paper supplement (https://openreview.net/forum?id=g9diuvxN6D)
Supplement: supplementary_material [file attachment]

version https://git-lfs.github.com/spec/v1
oid sha256:ec65bca6b78276f3a8fea5a571a8f09404c7eb667d15afa60aae6ba70d453ef0
size 22751
