# Supplementary material
Source: ML conference proceedings conference paper supplement (https://openreview.net/forum?id=g9diuvxN6D)
Supplement: supplementary_material [file attachment]

version https://git-lfs.github.com/spec/v1
oid sha256:5219047e07bfd7eb8e9678d5fef75e19755245f4cce0f62ba0538653438c2cf8
size 20396
