# Supplementary material
Source: ML conference proceedings conference paper supplement (https://openreview.net/forum?id=g9diuvxN6D)
Supplement: supplementary_material [file attachment]

version https://git-lfs.github.com/spec/v1
oid sha256:be51a4594f4177337c0b3d12b472dbbdc29ee716031d55af25c72c2f97b37d65
size 19478
