# Supplementary material
Source: ML conference proceedings conference paper supplement (https://openreview.net/forum?id=g9diuvxN6D)
Supplement: supplementary_material [file attachment]

version https://git-lfs.github.com/spec/v1
oid sha256:d138dc75445a3b9ee515e133c4ab161dde7bfaa5fe499348bec92c0e01e3f978
size 22906
