# Supplementary material
Source: ML conference proceedings conference paper supplement (https://openreview.net/forum?id=g9diuvxN6D)
Supplement: supplementary_material [file attachment]

version https://git-lfs.github.com/spec/v1
oid sha256:ec043ce288eed5ef9e7f90163358ceb52c2ab719243dd671e824b5c22d20890a
size 22519
