# Supplementary material
Source: ML conference proceedings conference paper supplement (https://openreview.net/forum?id=g9diuvxN6D)
Supplement: supplementary_material [file attachment]

version https://git-lfs.github.com/spec/v1
oid sha256:c002424b74913f1cc7870cc66c96f85121e5d18d15959fd941d491f308e1d41d
size 27312
