# Supplementary material
Source: ML conference proceedings conference paper supplement (https://openreview.net/forum?id=g9diuvxN6D)
Supplement: supplementary_material [file attachment]

version https://git-lfs.github.com/spec/v1
oid sha256:f624a5a827103930b09d23acf8b2ac57a5fd6dcaf38e04bb70308f20be8aea59
size 27137
