# Supplementary material
Source: ML conference proceedings conference paper supplement (https://openreview.net/forum?id=g9diuvxN6D)
Supplement: supplementary_material [file attachment]

version https://git-lfs.github.com/spec/v1
oid sha256:c195d304372f9304785232c6ed5c10fd1d165273bb683b7f7179ec08f4dc900f
size 20393
