# Supplementary material
Source: ML conference proceedings conference paper supplement (https://openreview.net/forum?id=g9diuvxN6D)
Supplement: supplementary_material [file attachment]

version https://git-lfs.github.com/spec/v1
oid sha256:cbc3038206564c0c8895a8a9a9c9e547f95fe2df4b83af4cacf46cc2602bff1d
size 26900
