# Supplementary material
Source: ML conference proceedings conference paper supplement (https://openreview.net/forum?id=g9diuvxN6D)
Supplement: supplementary_material [file attachment]

version https://git-lfs.github.com/spec/v1
oid sha256:97515485d17d4c83ca6321a66f6f463fc3c65015f3ffa65f4a18dcf8f91dfe68
size 27365
