# Supplementary material
Source: ML conference proceedings conference paper supplement (https://openreview.net/forum?id=g9diuvxN6D)
Supplement: supplementary_material [file attachment]

version https://git-lfs.github.com/spec/v1
oid sha256:4a3699c4717d95b12d097005a44ef805b82080a1fae819973063179a1b8593cc
size 22290
