# Supplementary material
Source: ML conference proceedings conference paper supplement (https://openreview.net/forum?id=g9diuvxN6D)
Supplement: supplementary_material [file attachment]

version https://git-lfs.github.com/spec/v1
oid sha256:835a7dd33d0307d012a8e544dfb7ded1b5d4b7e0c6d44a763179d47c979374de
size 22512
