# Supplementary material
Source: ML conference proceedings conference paper supplement (https://openreview.net/forum?id=g9diuvxN6D)
Supplement: supplementary_material [file attachment]

version https://git-lfs.github.com/spec/v1
oid sha256:ef1fe529f6c0992c9c0b16ffd3f165aa702db8047c693dff856af06f286107d4
size 27022
