# Supplementary material
Source: ML conference proceedings conference paper supplement (https://openreview.net/forum?id=g9diuvxN6D)
Supplement: supplementary_material [file attachment]

version https://git-lfs.github.com/spec/v1
oid sha256:e28a84db872f8ae399a5192b57ec1ff6cf279c863b1eb65961570d8ad149508d
size 21217
