# Supplementary material
Source: ML conference proceedings conference paper supplement (https://openreview.net/forum?id=g9diuvxN6D)
Supplement: supplementary_material [file attachment]

version https://git-lfs.github.com/spec/v1
oid sha256:235b6c8dae73c45010b8feb7e286ab2fa3a2ea384b835cdfbc0c19b369009905
size 21000
