# Supplementary material
Source: ML conference proceedings conference paper supplement (https://openreview.net/forum?id=g9diuvxN6D)
Supplement: supplementary_material [file attachment]

version https://git-lfs.github.com/spec/v1
oid sha256:c0b9c68942eaa8da9f2d140fa7b16179a53766f9a4ea1fb7ef52a829de40daa7
size 20610
