# Supplementary material
Source: ML conference proceedings conference paper supplement (https://openreview.net/forum?id=g9diuvxN6D)
Supplement: supplementary_material [file attachment]

version https://git-lfs.github.com/spec/v1
oid sha256:ea77a02293328acea7eb4cf06f497485d08c1182d772dcda02fc8a6b9130c205
size 26389
