# Supplementary material
Source: ML conference proceedings conference paper supplement (https://openreview.net/forum?id=g9diuvxN6D)
Supplement: supplementary_material [file attachment]

version https://git-lfs.github.com/spec/v1
oid sha256:bfe46ce796f64f12ecff56f16ac306ae19b79df059b7588b19de9b455673bfc9
size 30538
