# Supplementary material
Source: ML conference proceedings conference paper supplement (https://openreview.net/forum?id=g9diuvxN6D)
Supplement: supplementary_material [file attachment]

version https://git-lfs.github.com/spec/v1
oid sha256:1efc9627decce470c11b8d8c76d8ce6565f96244a475cba6929ad74d61e35104
size 20529
