# Supplementary material
Source: ML conference proceedings conference paper supplement (https://openreview.net/forum?id=g9diuvxN6D)
Supplement: supplementary_material [file attachment]

version https://git-lfs.github.com/spec/v1
oid sha256:da24edcdf0991a6ecad71e9af5b9af61a3e56213f68cab7223925af2649ad21a
size 27072
