# Supplementary material
Source: ML conference proceedings conference paper supplement (https://openreview.net/forum?id=g9diuvxN6D)
Supplement: supplementary_material [file attachment]

version https://git-lfs.github.com/spec/v1
oid sha256:c6e664e64f26e14c069ddddf68b120b844e157269c13acbbcb7bdd0de4461264
size 20123
