# Supplementary material
Source: ML conference proceedings conference paper supplement (https://openreview.net/forum?id=g9diuvxN6D)
Supplement: supplementary_material [file attachment]

version https://git-lfs.github.com/spec/v1
oid sha256:4df1081360ea9b52ec4b29129b92b8a5adf030bee8e295bb2f56ee31304edfce
size 20716
