# Supplementary material
Source: ML conference proceedings conference paper supplement (https://openreview.net/forum?id=g9diuvxN6D)
Supplement: supplementary_material [file attachment]

version https://git-lfs.github.com/spec/v1
oid sha256:412dbc581f37ebe77e9f6f1051a45681a3d47bdd89d328096986a2ba6e33ba34
size 21468
