# Supplementary material
Source: ML conference proceedings conference paper supplement (https://openreview.net/forum?id=g9diuvxN6D)
Supplement: supplementary_material [file attachment]

version https://git-lfs.github.com/spec/v1
oid sha256:abd1034ffc8000f976da2f9d745cbf4df7f69534e8f8465a541c97fdc0f27dab
size 26488
