# Supplementary material
Source: ML conference proceedings conference paper supplement (https://openreview.net/forum?id=g9diuvxN6D)
Supplement: supplementary_material [file attachment]

version https://git-lfs.github.com/spec/v1
oid sha256:4a60a4b07e9c4fb87a046ab3a42e7755cf6a32fd5c93daa07ad3c88b53a0893f
size 27879
