# Supplementary material
Source: ML conference proceedings conference paper supplement (https://openreview.net/forum?id=g9diuvxN6D)
Supplement: supplementary_material [file attachment]

version https://git-lfs.github.com/spec/v1
oid sha256:deef65f8dccec175f35b5c8eb16cd57200537f2ab8468c0e7b597c4aa1dd05bf
size 22929
