# Supplementary material
Source: ML conference proceedings conference paper supplement (https://openreview.net/forum?id=g9diuvxN6D)
Supplement: supplementary_material [file attachment]

version https://git-lfs.github.com/spec/v1
oid sha256:a2e4328d49a4ad420c331b78cf388d87c186f251adcb71647d7580be8110f945
size 20799
