# Supplementary material
Source: ML conference proceedings conference paper supplement (https://openreview.net/forum?id=g9diuvxN6D)
Supplement: supplementary_material [file attachment]

version https://git-lfs.github.com/spec/v1
oid sha256:ac1bd78a8e07acd5336be4ede026ae4640907bc13ac9db79d426f2c58c97eab7
size 30397
