# Supplementary material
Source: ML conference proceedings conference paper supplement (https://openreview.net/forum?id=g9diuvxN6D)
Supplement: supplementary_material [file attachment]

version https://git-lfs.github.com/spec/v1
oid sha256:aea4f1f388f1b099facd4d6bf2d1eb469a21c15641e86beb36189758ff53a1d3
size 20561
