# Supplementary material
Source: ML conference proceedings conference paper supplement (https://openreview.net/forum?id=g9diuvxN6D)
Supplement: supplementary_material [file attachment]

version https://git-lfs.github.com/spec/v1
oid sha256:31311901a8394c758850c755dddeb788abf48fba839e4915b9f67469d5a2763e
size 27493
