# Supplementary material
Source: ML conference proceedings conference paper supplement (https://openreview.net/forum?id=g9diuvxN6D)
Supplement: supplementary_material [file attachment]

version https://git-lfs.github.com/spec/v1
oid sha256:5b75c200c9e2cb1e0534cba367ebbd279b4491ccdf08349394f9d91e7930688b
size 20865
