# Supplementary material
Source: ML conference proceedings conference paper supplement (https://openreview.net/forum?id=g9diuvxN6D)
Supplement: supplementary_material [file attachment]

version https://git-lfs.github.com/spec/v1
oid sha256:2c8e666ebb831b97c797579d9929e67d34f0c148212e2ac570f2996a4fdb0229
size 22736
