# Supplementary material
Source: ML conference proceedings conference paper supplement (https://openreview.net/forum?id=g9diuvxN6D)
Supplement: supplementary_material [file attachment]

version https://git-lfs.github.com/spec/v1
oid sha256:a104b3d7f7239a99033c2f7fa882e3d8ce5a4eea6631861cda7eb52be9b6e37c
size 29762
