# Supplementary material
Source: ML conference proceedings conference paper supplement (https://openreview.net/forum?id=g9diuvxN6D)
Supplement: supplementary_material [file attachment]

version https://git-lfs.github.com/spec/v1
oid sha256:aceb0fa7b3e0d941f9cbdec3ec28b01367728d8c4b4f0b55e5a70b8a7005d7d8
size 27073
