# Supplementary material
Source: ML conference proceedings conference paper supplement (https://openreview.net/forum?id=g9diuvxN6D)
Supplement: supplementary_material [file attachment]

version https://git-lfs.github.com/spec/v1
oid sha256:a52235e9f1dd4d398c6923e754218aa0ad9dddf534c05b4ad2c6bcac74aedb5b
size 20393
