# Supplementary material
Source: ML conference proceedings conference paper supplement (https://openreview.net/forum?id=g9diuvxN6D)
Supplement: supplementary_material [file attachment]

version https://git-lfs.github.com/spec/v1
oid sha256:027e7fe442e6f81c48c6897887cf8380278265318fadb6925ce691ca40194453
size 29490
