# Supplementary material
Source: ML conference proceedings conference paper supplement (https://openreview.net/forum?id=g9diuvxN6D)
Supplement: supplementary_material [file attachment]

version https://git-lfs.github.com/spec/v1
oid sha256:6164f29031b21f36ed1f626bc601fdc17ad02b0d71cec7d9cbb1cee02534f70c
size 23148
