# Supplementary material
Source: ML conference proceedings conference paper supplement (https://openreview.net/forum?id=g9diuvxN6D)
Supplement: supplementary_material [file attachment]

version https://git-lfs.github.com/spec/v1
oid sha256:9f879f94dae7ede2820192fa6c69069765ab625652d6667e9d1dbf25c0fe01b0
size 27043
