# Supplementary material
Source: ML conference proceedings conference paper supplement (https://openreview.net/forum?id=g9diuvxN6D)
Supplement: supplementary_material [file attachment]

version https://git-lfs.github.com/spec/v1
oid sha256:4f275608abe35f61ff8d52755b00a287e76f4a77cb34cc93fc6640f7d2a90bbe
size 27256
