# Supplementary material
Source: ML conference proceedings conference paper supplement (https://openreview.net/forum?id=g9diuvxN6D)
Supplement: supplementary_material [file attachment]

version https://git-lfs.github.com/spec/v1
oid sha256:fe740681434d604f37a26111be9162fa66b750e21e81549de5435cafa19f9532
size 20588
