# Supplementary material
Source: ML conference proceedings conference paper supplement (https://openreview.net/forum?id=g9diuvxN6D)
Supplement: supplementary_material [file attachment]

version https://git-lfs.github.com/spec/v1
oid sha256:d09534e78b0da4913110fb01485e1d2d14be02248a4646149f8137ccb1077b83
size 26578
